# Supplementary material for: Helical pyrene-array along the outside of duplex RNA
Source: Royal Society of Chemistry journal article supplement (doi:10.1039/b507808c), 2005-01-01
Supplement: b507808c.pdf [file b507808c.pdf]

**Electronic Supplementary Information**

**Helical aggregation of pyrenes outside double stranded RNA  
exhibits significant excimer fluorescence**

**Mitsunobu Nakamura,\* Yukinori Ohtoshi and Kazushige Yamana\***

*Department of Materials Science and Chemistry, Graduate School of Engineering,  
University of Hyogo, 2167 Shosha, Himeji 671-2201, Japan*

E-mail: mitunobu@eng.u-hyogo.ac.jp

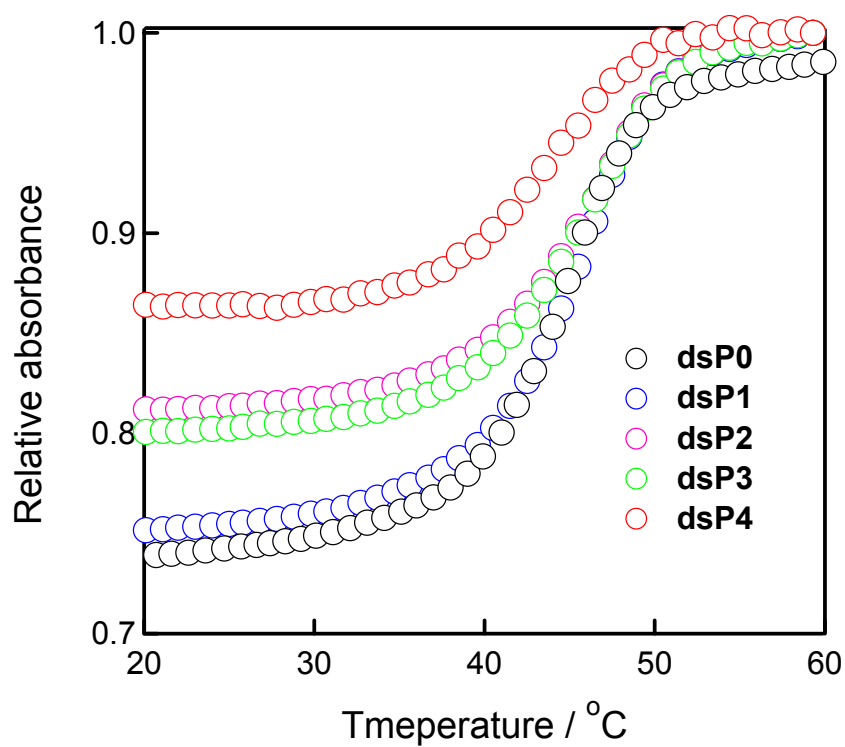

**Fig. S1** UV-melting curve for **Pn** duplexes. Measurements were carried out in a buffer containing 10 mM sodium phosphate and 0.1 M NaCl, adjusted to pH7.0, and monitored at 260 nm for 1:1 mixture of oligonucleotides with increase in temperature from 20 to 80 °C with a rate of 0.5 °C/min.

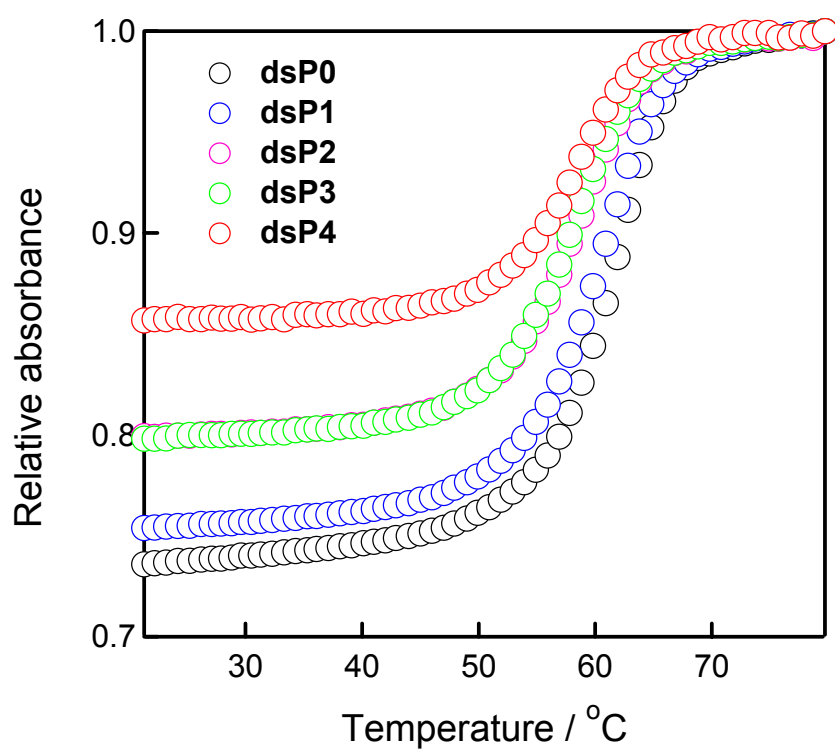

**Fig. S2** UV-melting curve for **Pn** duplexes. Measurements were carried out in a buffer containing 10 mM sodium phosphate and 1 M NaCl, adjusted to pH7.0, and monitored at 260 nm for 1:1 mixture of oligonucleotides with increase in temperature from 20 to 80 °C with a rate of 0.5 °C/min.
